# Supplementary material for: A cycle-durable hollow nanoneedle structure with a nanosheet as a conductive substrate CoS1.097/Ni9S8@RGO to enhance supercapacitor performance
Source: Royal Society of Chemistry journal article supplement (doi:10.1039/d3dt00574g), 2023-01-01
Supplement: d3dt00574g1.pdf [file d3dt00574g1.pdf]

**A cycle-durable hollow nanoneedle structure with a nanosheet as a conductive substrate**

**CoS<sub>1.097</sub>/Ni<sub>9</sub>S<sub>8</sub>@RGO to enhance supercapacitor performance**

Yanmin Wang<sup>a</sup>, Chong Sun<sup>a</sup>, Hu Zhao<sup>a</sup>, Jinlong Cui<sup>a</sup>, Yongqiang Zhang<sup>a\*</sup>, Wenxiu He<sup>a\*</sup>

School of Chemistry and Chemical Engineering, Inner Mongolia University of Science &

Technology, Baotou, Inner Mongolia 014010, China

\* Corresponding author at: E-mail address: wenxiu\_he@foxmail.com;

yongqiang\_zhang1203@foxmail.com.

## References

- 1 Y. Chen, L.J. Wang, H. Gan, Y.H. Jiang, J.B. Feng, J.Q. Liu, X.C. Shi, *J. Energy. Storage.*, 2022, 47, 103625.
- 2 Y.D. Miao, X.P. Zhang, J. Zhan, Y.W. Sui, J.Q. Qi, F.X. Wei, Q.K. Meng, Y.Z. He, Y.J. Ren, Z.Z. Zhan, Z. Sun, *Adv. Mater. Interaces.*, 2020, 3, 1901618.
- 3 C. Huang, A.M. Gao, Z.H. Zhu, F.Y. Yi, M.Y. Wang, J.N. Hao, H.H. Cheng, J.Z. Ling, D. Shu, *Electrochim. Acta.*, 2022, 406, 139872.
- 4 C. Sambathkumar, S. Sudhahar, P. Devendran, *J. Alloy. Compd.*, 2022, 920, 165839.
- 5 Y.T. Wang, X.F. He, X.M. Chen, Y. Zhang, F.T. Li, Y. Zhou, C. Meng, *Appl Surf. Sci.*, 2022, 596, 153600.

Table. S1 The specific capacitance values of different electrodes at 1 to 20 A g<sup>-1</sup>

| Current densities / A g <sup>-1</sup> | 2-CSNS@RGO | 2-CSNS  | 1-CSNS  |
|---------------------------------------|------------|---------|---------|
| samples / C g <sup>-1</sup>           |            |         |         |
| 1                                     | 1650.13    | 1522.80 | 1370.74 |
| 2                                     | 1583.04    | 1392.60 | 1270.61 |
| 4                                     | 1480.96    | 1301.20 | 1151.73 |
| 6                                     | 1452.00    | 1243.20 | 1070.73 |
| 8                                     | 1396.91    | 1205.60 | 1014.62 |
| 10                                    | 1352.40    | 1172.00 | 961.60  |
| 20                                    | 1220.80    | 1066.00 | 831.36  |
| rate performance                      | 74.0 %     | 69.9 %  | 60.6 %  |

Table. S2 The specific capacitance values of 2-CSNS//AC and 2-CSNS@RGO//AC at 1 to 20 A g<sup>-1</sup>

| Current densities / A g <sup>-1</sup> | 2-CSNS@RGO//AC | 2-CSNS//AC |
|---------------------------------------|----------------|------------|
| samples / F g <sup>-1</sup>           |                |            |
| 0.8                                   | 247.58         | 224.86     |
| 1.6                                   | 225.90         | 185.37     |
| 3.2                                   | 197.78         | 147.32     |
| 4.8                                   | 178.18         | 134.80     |
| 6.4                                   | 161.66         | 115.51     |
| 8                                     | 149.26         | 94.08      |
| 12                                    | 127.99         | 74.14      |
| rate performance                      | 51.7 %         | 33.0 %     |

Table. S3 Characteristics of supercapacitors in literature and this paper

| Supercapacitors                                                                    | Potential window (V) | Maximum energy density (Wh kg <sup>-1</sup> ) | Power density (kW kg <sup>-1</sup> ) | Retention (%) cycling Number current density     | Refs.     |
|------------------------------------------------------------------------------------|----------------------|-----------------------------------------------|--------------------------------------|--------------------------------------------------|-----------|
| NiCo <sub>2</sub> S <sub>4</sub> @NiS/CoS//Fe <sub>3</sub> O <sub>4</sub> NSs@ERGO | 1.6                  | 58.44                                         | 0.8002                               | 86.4% after 10,000 times at 20 A g <sup>-1</sup> | 1         |
| NiS@CoS//AC                                                                        | 1.5                  | 24.1                                          | 0.7521                               | 80% after 5000 times at 5 A g <sup>-1</sup>      | 2         |
| Ni <sub>x</sub> Co <sub>1-x</sub> S/C-3//AC                                        | 1.5                  | 45.31                                         | 0.748                                | 91.0% after 8000 times at 50 mV s <sup>-1</sup>  | 3         |
| Co <sub>9</sub> S <sub>8</sub> //AC                                                | 1.7                  | 15.47                                         | 0.1275                               | 81.3% after 7000 times at 7 A g <sup>-1</sup>    | 4         |
| NCS-1//AC                                                                          | 1.6                  | 29.3                                          | 0.4                                  | 87.27% after 3000 times at 4 A g <sup>-1</sup>   | 5         |
| 2-CSNS//AC                                                                         | 1.6                  | 79.95                                         | 0.80                                 | -                                                | This work |
| 2-CSNS@RGO//AC                                                                     | 1.6                  | 88.0                                          | 0.80                                 | 131.6% after 30000 times at 10 A g <sup>-1</sup> | This work |

**Fig. S1.** (a) the CV of the 1-CSNS electrodes at scan rates of 5, 10, 20, 30, 40 and 50  $\text{mV s}^{-1}$ , (b) the CV of the 2-CSNS and 2-CSNS@RGO electrodes was performed at scan rates of 5, 10, 20, 30, 40 and 50  $\text{mV s}^{-1}$ , (c) the CV of the 2-CSNS@RGO electrodes was performed at scan rates of 5, 10, 20, 30, 40 and 50  $\text{mV s}^{-1}$ .

**Fig. S2.** (a) the GCD of 1-CSNS electrodes 1 to 20  $\text{A g}^{-1}$ , (b) the GCD of 2-CSNS electrodes 1 to 20  $\text{A g}^{-1}$ , (c) the GCD of 2-CSNS@RGO electrodes 1 to 20  $\text{A g}^{-1}$ .

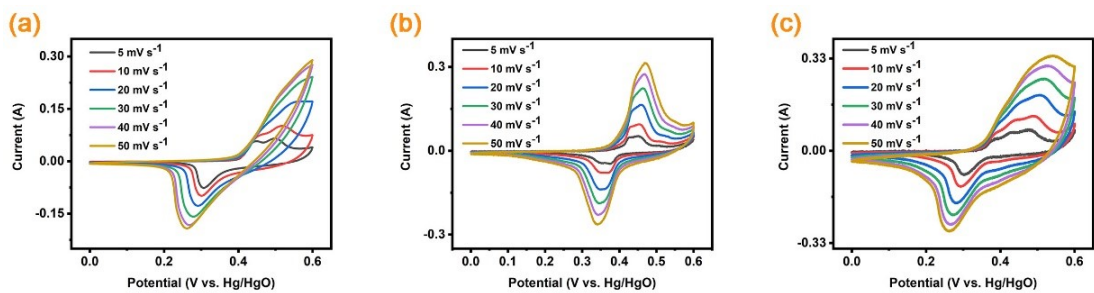

Fig. S1.

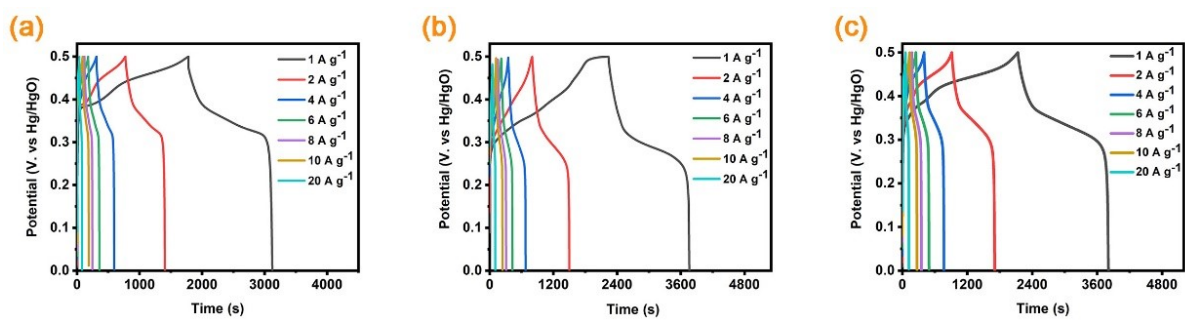

Fig. S2.
